# Supplementary material for: Comprehensive analysis of NT5DC family prognostic and immune significance in breast cancer
Source: PubMed Central journal article supplement (PMC9907984; doi:10.1097/md.0000000000032927), 2023-02-10

Figure S2. The diagnostic value of NT5DC family in breast cancer. The ROC curve of NT5C2 (A), NT5DC1 (B), NT5DC2 (C), NT5DC3 (D) and NT5DC4 (E).

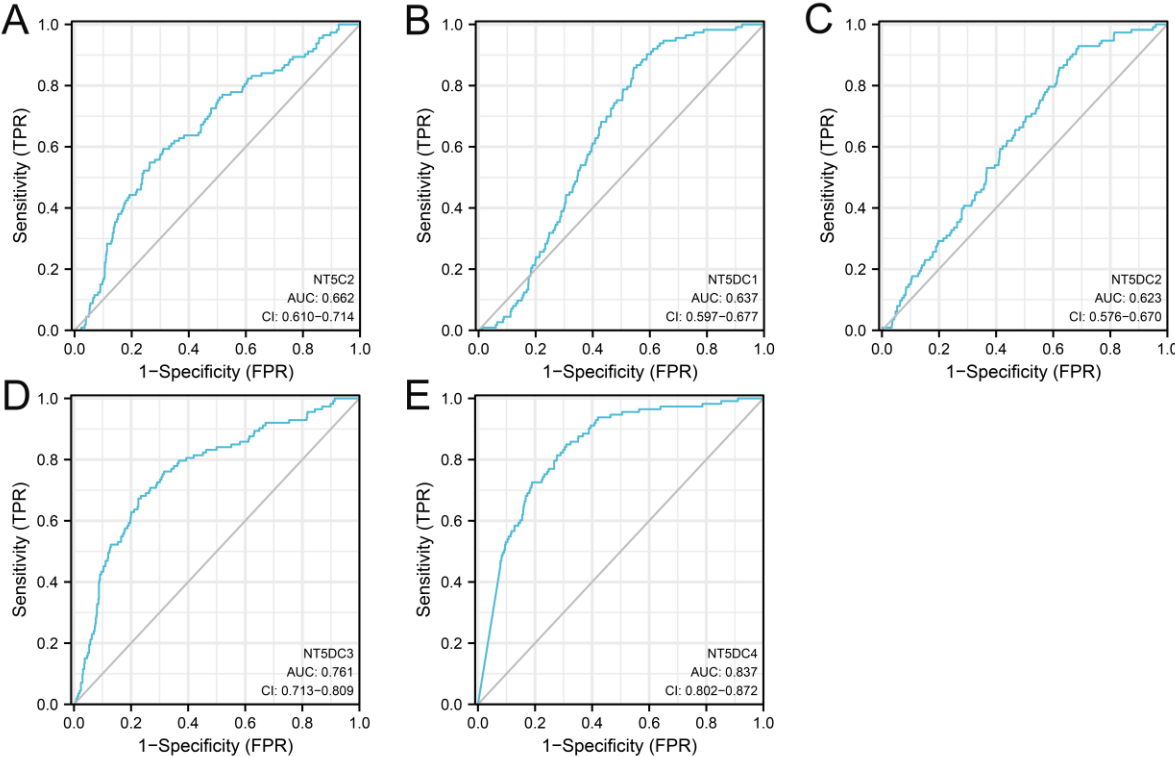

Supplement: medi-102-e32927-s002.pdf [file medi-102-e32927-s002.pdf]
